# Supplementary material for: Imaging flow cytometry reveals a dual role for exopolysaccharides in biofilms: To promote self-adhesion while repelling non-self-community members
Source: PubMed Central journal article supplement — Comput Struct Biotechnol J. 2021 Dec 4;20:15–25. doi: 10.1016/j.csbj.2021.11.043 (PMC8666610; doi:10.1016/j.csbj.2021.11.043), 2021-12-04
Supplement: mmc1.pdf [file mmc1.pdf]

**Harsh Maan<sup>1</sup>, Tatyana L. Povolotsky<sup>1</sup>, Ziv Porat<sup>2</sup>, Maxim Itkin<sup>3</sup>, Sergey Malirsky<sup>3</sup>, and Ilana Kolodkin-Gal<sup>1</sup>\$**

<sup>1</sup> Department of Molecular Genetics, Weizmann Institute of Science, Rehovot, Israel

<sup>2</sup> Flow Cytometry Unit, Life Sciences Core Facilities, Weizmann Institute of Science, Rehovot, Israel

<sup>3</sup> Life Science Core Facilities Weizmann Institute of Science, 234 Herzl Street, Rehovot, Israel

## **Supporting Information**

Supporting Figures (S1-S8)

Supporting Table (S1 and S2)

Supporting References

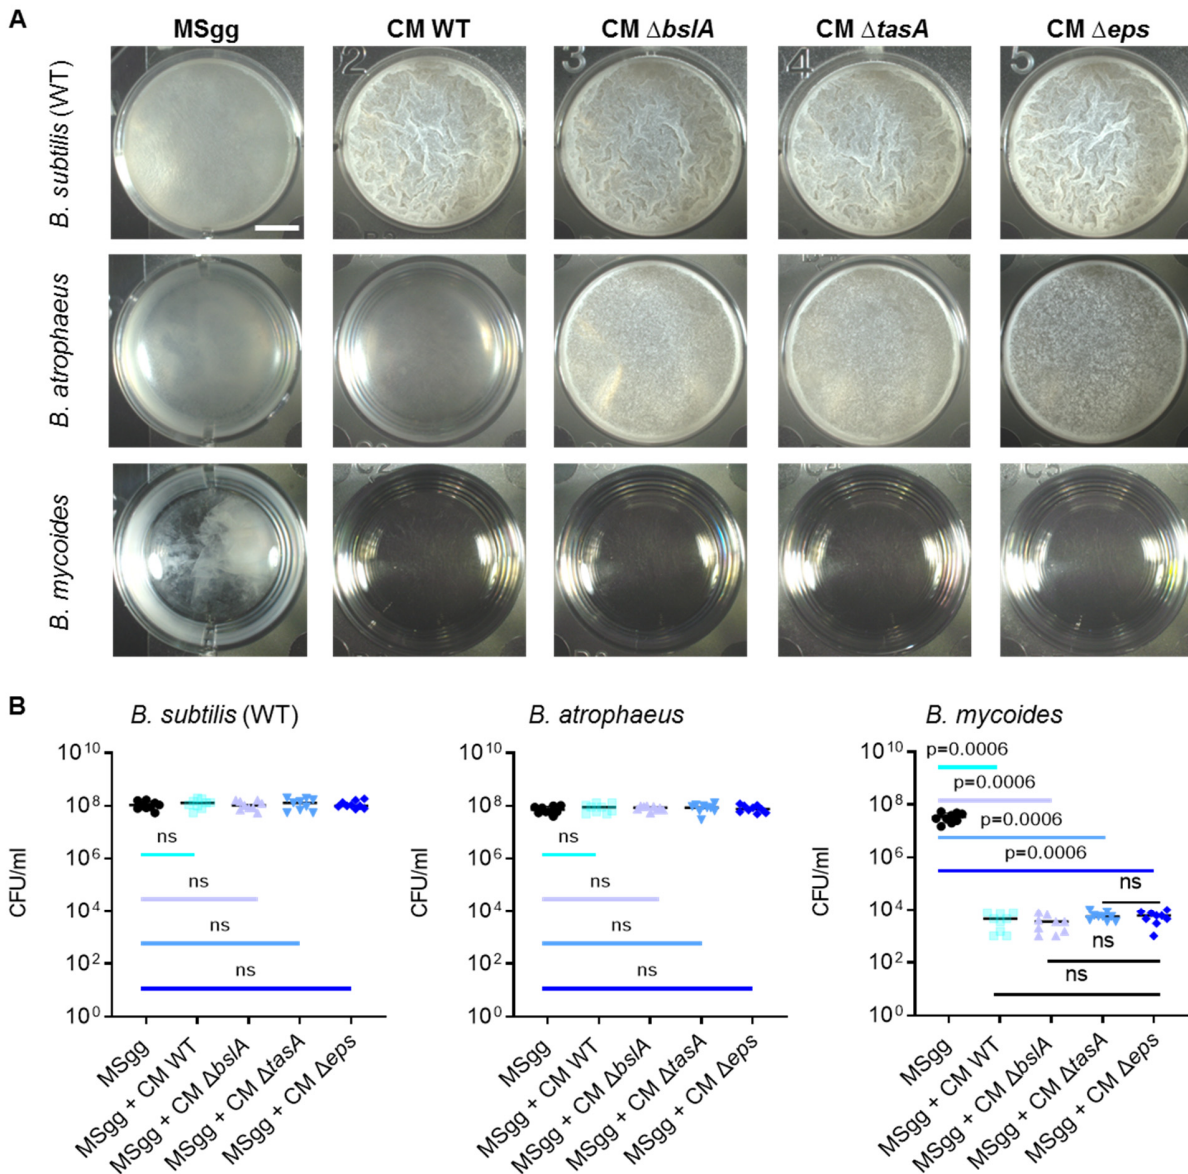

**Figure S1. A)** Monitoring pellicle formation and growth of the indicated strains when grown in MSgg medium and MSgg medium supplemented with conditioned medium (CM) from WT *B. subtilis* and its ECM mutants (10%, v/v). Cells were grown at 30°C and images were obtained at 24 h post inoculation and are representative of data presented in B. **B)** The number of CFU obtained when indicated strains were either grown in MSgg medium or MSgg medium supplemented with conditioned medium (CM) from WT *B. subtilis* and its ECM mutants (10%, v/v). Cells were grown at 30°C, and were harvested at 24 h post inoculation. Graphs represent mean  $\pm$  SD from three independent experiments (n = 9). Statistical analysis was performed using Brown-Forsythe and Welch's ANOVA, with Dunnett's T3 multiple comparisons test.  $P < 0.05$  was considered statistically significant. Scale bar = 5mm

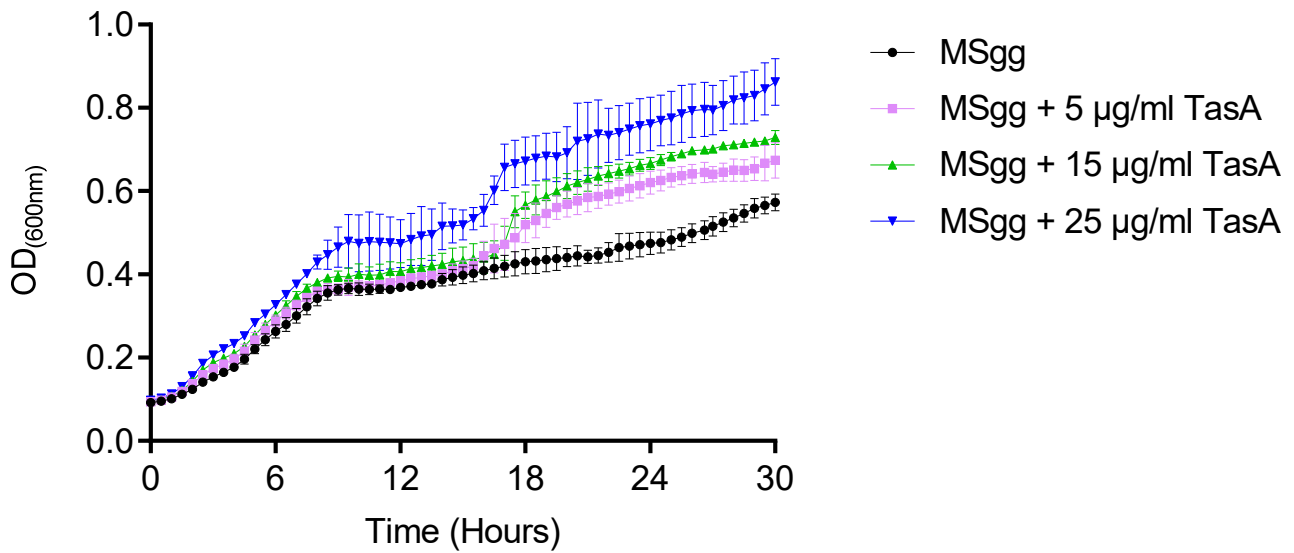

|                               | 5h     | 10h    | 15h     | 20h     | 25h     | 30h     |
|-------------------------------|--------|--------|---------|---------|---------|---------|
| MSgg vs. MSgg + 5 µg/ml TasA  | 0.7508 | 0.9914 | 0.8785  | <0.0001 | <0.0001 | 0.0004  |
| MSgg vs. MSgg + 15 µg/ml TasA | 0.4099 | 0.387  | 0.4022  | <0.0001 | <0.0001 | <0.0001 |
| MSgg vs. MSgg + 25 µg/ml TasA | 0.0417 | 0.0001 | <0.0001 | <0.0001 | <0.0001 | <0.0001 |

**Figure S2. Monitoring growth of *B. mycooides* when supplemented with purified TasA protein** Growth of *B. mycooides* was monitored in MSgg medium and MSgg medium supplemented with the purified TasA protein in increasing concentrations. An increase in the growth was observed in the presence of purified tasA protein. Graph represent the mean  $\pm$  SD from three independent experiments (n = 9). Statistical analysis was performed using two-way ANOVA followed by Tukey's multiple comparison post hoc testing. P < 0.05 was considered

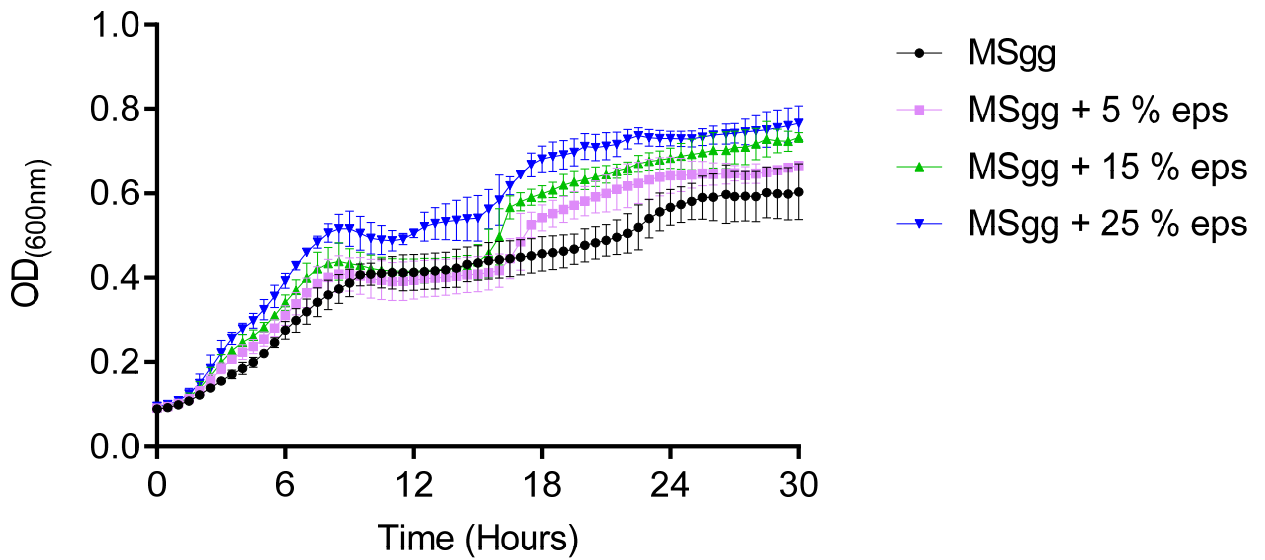

|                          | 5h     | 10h    | 15h    | 20h     | 25h     | 30h     |
|--------------------------|--------|--------|--------|---------|---------|---------|
| MSgg vs. MSgg + 5 % eps  | 0.4661 | 0.9664 | 0.6626 | 0.0005  | 0.0609  | 0.0666  |
| MSgg vs. MSgg + 15 % eps | 0.0679 | 0.9292 | 0.9994 | <0.0001 | 0.0002  | <0.0001 |
| MSgg vs. MSgg + 25 % eps | 0.0005 | 0.0061 | 0.0004 | <0.0001 | <0.0001 | <0.0001 |

**Figure S3: Monitoring growth of *B. mycoides* when supplemented with purified eps.** Growth of *B. mycoides* was monitored in MSgg medium and MSgg medium supplemented with the purified eps in increasing concentrations. An increase in the growth was observed in the presence of purified eps. Graph represent the mean  $\pm$  SD from three independent experiments (n = 9). Statistical analysis was performed using two-way ANOVA followed by Tukey's multiple comparison post hoc testing. P < 0.05 was considered statistically significant. P values at

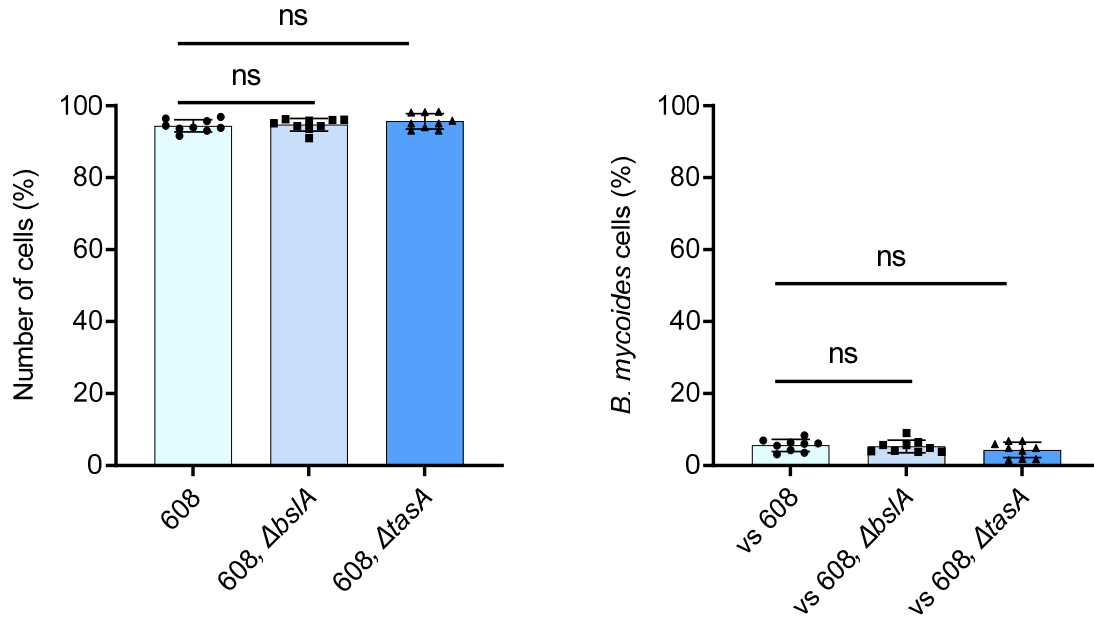

**Figure S4: Quantifying the number of cells present in the pellicles of each competition assay using imaging flow cytometry.** A competition assay was set up between WT *B. subtilis* stains harboring  $P_{hyerspank-gfp}$  (608), 608,  $\Delta$ tasA and 608,  $\Delta$ bslA mutants vs *B. mycooides*, in MSgg medium. As  $\Delta$ eps mutant cannot form pellicles, hence it was not considered for this competition assay. **A)** Quantifying the number of 608 and its deletions mutants cells, in competition against *B. mycooides* cells, using imaging flow cytometry. **B)** Quantifying the number of *B. mycooides* cells in competition against 608 and its deletions mutants using imaging flow cytometry. Data were collected 72 h post inoculation, and 100,000 cells were counted. Graphs represent mean  $\pm$  SD from three independent experiments (n=9). The data were analyzed using IDEAS 6.3. Statistics analysis was performed using Brown-Forsythe and Welch's ANOVA, with Dunnett's T3 multiple comparisons test.  $P < 0.05$  was considered statistically significant.

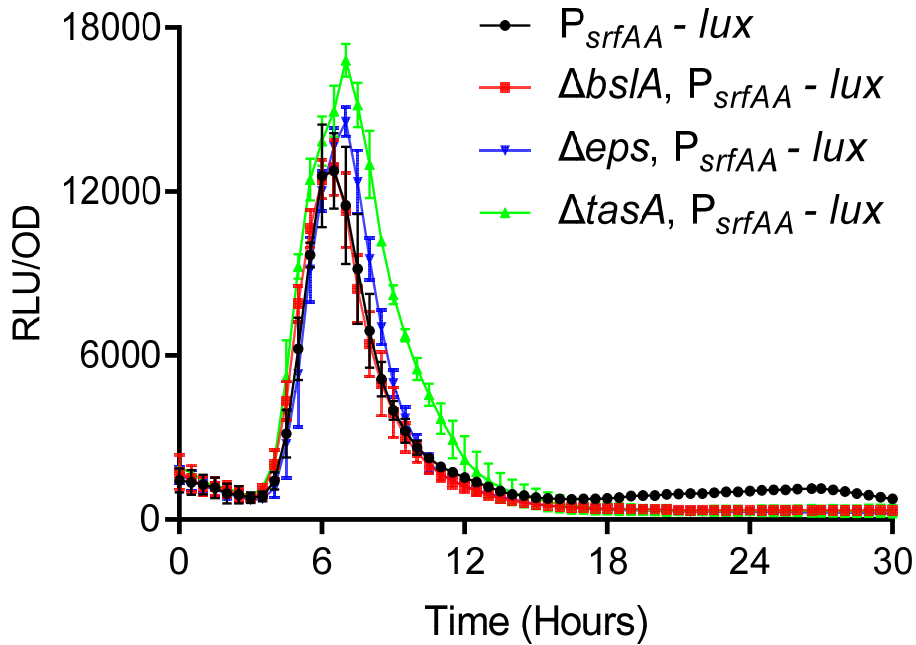

|                                                      | 5h      | 8h      | 10h     | 20h    | 30h    |
|------------------------------------------------------|---------|---------|---------|--------|--------|
| $P_{srfAA} - lux$ vs. $\Delta bslA, P_{srfAA} - lux$ | <0.0001 | 0.4753  | 0.9369  | 0.4375 | 0.5921 |
| $P_{srfAA} - lux$ vs. $\Delta tasA, P_{srfAA} - lux$ | <0.0001 | <0.0001 | <0.0001 | 0.3748 | 0.5439 |
| $P_{srfAA} - lux$ vs. $\Delta eps, P_{srfAA} - lux$  | 0.0498  | <0.0001 | 0.9815  | 0.3428 | 0.3981 |

**Figure S5: Analysis of the luciferase activity in a WT *B. subtilis* strain harboring  $P_{srfAA}$ -lux (surfactin) reporter, and its indicated ECM deletion mutants.** Luminescence was monitored in MSgg medium, at 30°C for 30 h. Graphs represent mean  $\pm$  SD from three independent experiments (n = 9). Statistical analysis was performed using two-way ANOVA followed by Dunnett's multiple comparison test. P < 0.05 was considered statistically significant. P values at different time points are shown in the table. Luciferase activity was normalized to avoid artifacts related to differential cell numbers as RLU/OD.

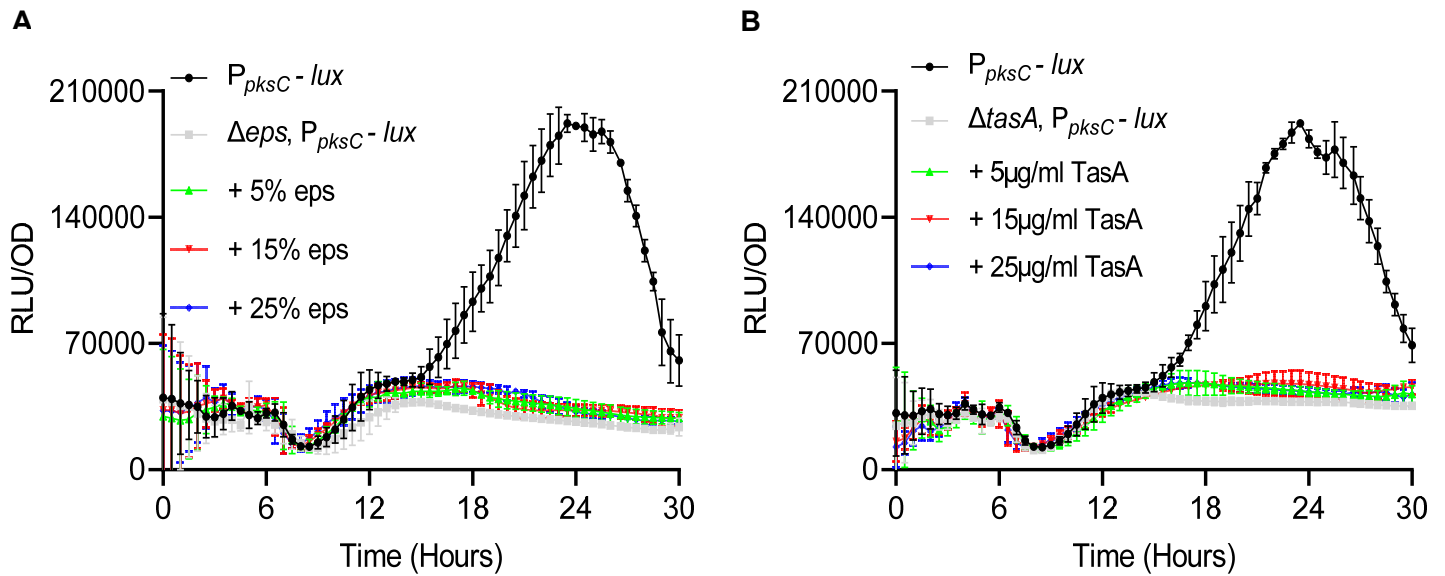

**Figure S6: Analysis of the luciferase activity in a WT *B. subtilis* strain harboring  $P_{pksC}$ -*lux* (bacillaene) reporter, and its indicated  $\Delta eps$  and  $\Delta tasA$  deletion mutants.** The mutants were supplemented with **A)** purified eps in increasing concentrations. **B)** Purified TasA in increasing concentrations. Luminescence was monitored in MSgg medium, at 30°C for 30 h. Graphs represent mean  $\pm$  SD from three independent experiments ( $n = 9$ ). Luciferase activity was normalized to avoid artifacts related to differential cell numbers as RLU/OD.



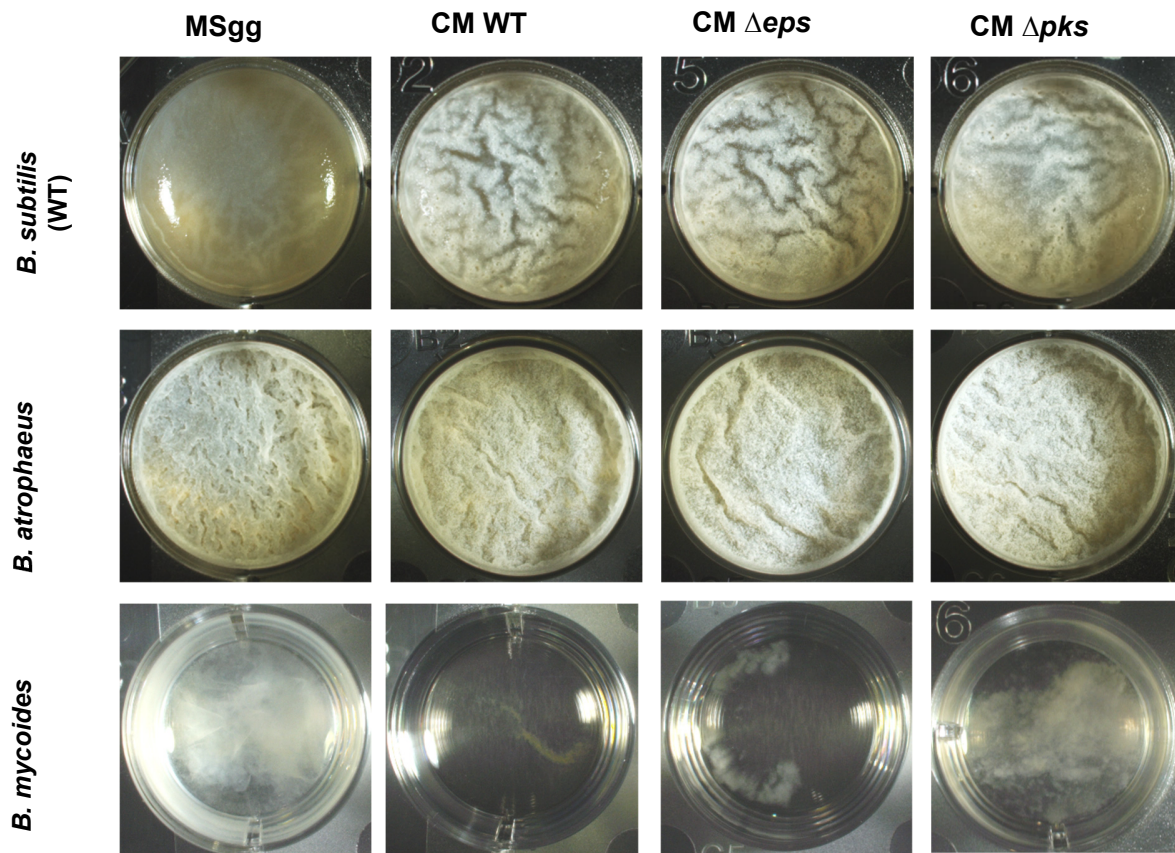

**Figure S7. The bioactivity of the CM on pellicle formation.** Monitoring pellicle formation and growth of the indicated strains in MSgg medium supplemented with conditioned medium (CM) of WT *B. subtilis* and its  $\Delta eps$  and  $\Delta pks$  mutants (10%, v/v). Cells were grown at 30°C and images were obtained at 72 h post inoculation, and are representative of data shown in Figure 4B.



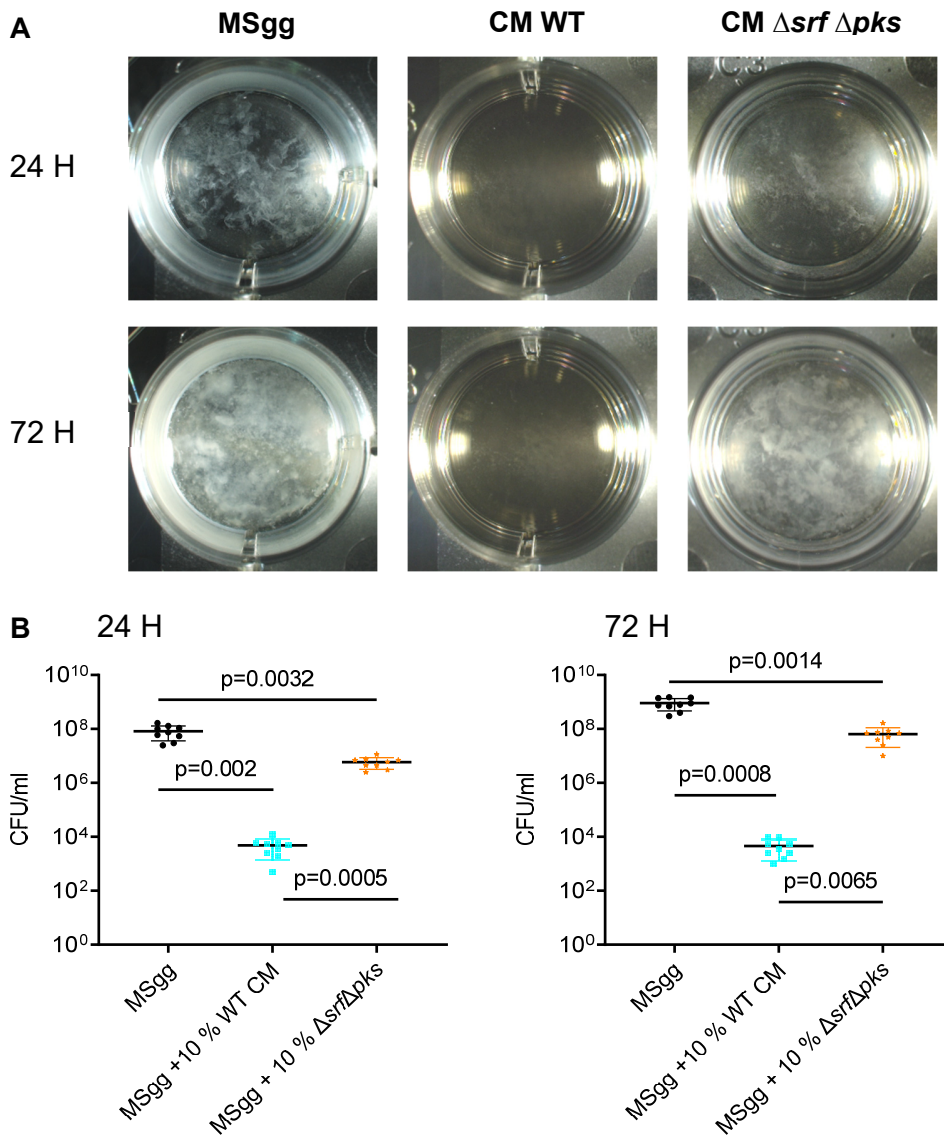

**Figure S8. The bioactivity of the CM on *B. mycoides* growth.** **A)** Monitoring growth of *B. mycoides* in MSgg medium supplemented with conditioned medium (CM) of WT *B. subtilis* and its  $\Delta srf \Delta pks$  mutants (10%, v/v). Cells were grown at 30°C and images were obtained at 24 h and 72 h post inoculation, and are representative of data shown in Figure S8B. **B)** The number of CFU obtained when indicated strains were either grown in MSgg medium or MSgg medium supplemented with conditioned medium (CM) from WT *B. subtilis*  $\Delta srf \Delta pks$  mutants (10%, v/v). Cells were grown at 30°C, and were harvested at 24 h and 72 h post inoculation. Graphs represent mean  $\pm$  SD from three independent experiments (n = 9). Statistical analysis was performed using Brown-Forsythe and Welch's ANOVA, with Dunnett's T3 multiple comparisons test. P < 0.05 was considered statistically significant.

### Supplementary Table 1

| Expected m/z | Observed m/z | Mass error (ppm) | Observed RT (min) | Observed drift (ms) | Formula      | Observed CCS (Å <sup>2</sup> ) | Feature |
|--------------|--------------|------------------|-------------------|---------------------|--------------|--------------------------------|---------|
| 234.1125     | 234.1131     | 2.49             | 26.17             | 6.67                | C13H16NO3    |                                |         |
| 251.143      | 251.1434     | 1.27             | 26.17             | 6.38                | C18H19O      |                                |         |
| 380.222      | 380.2224     | 1.02             | 26.17             | 6.26                | C24H30NO3    |                                |         |
| 382.2377     | 382.2384     | 1.9              | 26.18             | 6.37                | C24H32NO3    |                                |         |
| 432.2533     | 432.2547     | 3.09             | 26.17             | 6.48                | C28H34NO3    |                                |         |
| 449.2799     | 449.2806     | 1.72             | 26.17             | 6.41                | C28H37N2O3   |                                |         |
| 563.348      | 563.3492     | 2.22             | 26.17             | 6.53                | C34H47N2O5   |                                | -OH     |
| 603.3405     | 603.3409     | 0.66             | 26.17             | 6.46                | C34H48N2O6Na | 245.1                          | +Na     |
| 581.3585     | 581.3594     | 1.55             | 26.17             | 6.43                | C34H49N2O6   | 244.26                         | +H      |

**Table S1.** Bacillaene was putatively identified using adducts, fragmentation, and mass accuracy. Identified mass signals associated with bacillaene are presented in the table above.

## Supplementary Table 2

### List of strains used in the study

| Strain                              | Description                                                                                                                                                                                                                      | Source or reference          |
|-------------------------------------|----------------------------------------------------------------------------------------------------------------------------------------------------------------------------------------------------------------------------------|------------------------------|
| <i>B. subtilis</i> NCIB 3610        | Wild type                                                                                                                                                                                                                        | [1]                          |
| <i>B. atrophaeus</i> 1942           | Wild type                                                                                                                                                                                                                        | Rotem Sorek lab, WIS, Israel |
| <i>B. mycoides</i> AH621            | Wild type                                                                                                                                                                                                                        | Rotem Sorek lab, WIS, Israel |
| $P_{hyperspank-gfp}$ (608)          | <i>B. subtilis amyE::P_{hyperspank-gfp}</i> (Cm <sup>r</sup> ), constitutively expressing hyperspank promoter tagged to the gfp reporter integrated in the neutral <i>amyE</i> locus                                             | [2]                          |
| $\Delta bsIA, P_{hyperspank-gfp}$   | DNA was extracted from <i>B. subtilis</i> $\Delta bsIA$ (lab stock), and transferred into <i>B. subtilis</i> $P_{hyperspank-gfp}$ as described in materials and methods. Cm <sup>r</sup> , SP <sup>r</sup>                       | This study                   |
| $\Delta epsA-O, P_{hyperspank-gfp}$ | DNA was extracted from <i>B. subtilis</i> $\Delta epsA-O$ (lab stock), and transferred into <i>B. subtilis</i> $P_{hyperspank-gfp}$ as described in materials and methods. Cm <sup>r</sup> , Lnc <sup>r</sup> , Ery <sup>r</sup> | This study                   |
| $\Delta tasA, P_{hyperspank-gfp}$   | DNA was extracted from <i>B. subtilis</i> $\Delta tasA$ (lab stock), and transferred into <i>B. subtilis</i> $P_{hyperspank-gfp}$ as described in materials and methods. Cm <sup>r</sup> , Kan <sup>r</sup>                      | This study                   |
| $P_{pksC-lux}$                      | <i>B. subtilis sacA::P_{pksC-lux}</i> (Cm <sup>r</sup> ), promoter of bacillaene operon tagged to the luciferase reporter integrated in the neutral <i>SacA</i> locus                                                            | [3]                          |

|                                        |                                                                                                                                                                                                                                              |            |
|----------------------------------------|----------------------------------------------------------------------------------------------------------------------------------------------------------------------------------------------------------------------------------------------|------------|
| $P_{srfAA-lux}$                        | <i>B. subtilis</i> <i>sacA::P<sub>srfAA-lux</sub></i> (Cm <sup>r</sup> ), promoter of surfactin operon tagged to the luciferase reporter integrated in the neutral <i>sacA</i> locus                                                         | [4]        |
| $\Delta bsIA, P_{srfAA-lux}$           | DNA was extracted from <i>B. subtilis</i> $\Delta bsIA$ (lab stock), and transferred into <i>B. subtilis</i> $P_{srfAA-lux}$ as described in materials and methods. Cm <sup>r</sup> , SP <sup>r</sup>                                        | This study |
| $\Delta espA-O, P_{srfAA-lux}$         | DNA was extracted from <i>B. subtilis</i> $\Delta espA-O$ (lab stock), and transferred into <i>B. subtilis</i> $P_{srfAA-lux}$ as described in materials and methods. Cm <sup>r</sup> , Lnc <sup>r</sup> , Ery <sup>r</sup>                  | This study |
| $\Delta tasA$ (Tn 10), $P_{srfAA-lux}$ | DNA was extracted from <i>B. subtilis</i> $\Delta tasA$ (Tn 10), (lab stock), and transferred into <i>B. subtilis</i> $P_{srfAA-lux}$ as described in materials and methods. Cm <sup>r</sup> , Sp <sup>r</sup>                               | This study |
| $\Delta bsIA, P_{pksC-lux}$            | DNA was extracted from <i>B. subtilis</i> $\Delta bsIA$ (lab stock), and transferred into <i>B. subtilis</i> $P_{pksC-lux}$ as described in materials and methods. Cm <sup>r</sup> , SP <sup>r</sup>                                         | This study |
| $\Delta espA-O, P_{pksC-lux}$          | DNA was extracted from <i>B. subtilis</i> $\Delta espA-O$ (lab stock), and transferred into <i>B. subtilis</i> $P_{pksC-lux}$ as described in materials and methods. Cm <sup>r</sup> , Lnc <sup>r</sup> , Ery <sup>r</sup>                   | This study |
| $\Delta tasA$ (Tn 10), $P_{pksC-lux}$  | DNA was extracted from <i>B. subtilis</i> $\Delta tasA$ (Tn 10), (lab stock), and transferred into <i>B. subtilis</i> $P_{pksC-lux}$ as described in materials and methods. Cm <sup>r</sup> , Sp <sup>r</sup>                                | This study |
| $P_{pksC-gfp}$                         | <i>B. subtilis</i> <i>amyE::P<sub>pksC-gfp</sub></i> (Cm <sup>r</sup> , Sp <sup>r</sup> ), promoter of bacillaene operon tagged to the luciferase reporter integrated in the neutral <i>amyE</i> locus                                       | [3]        |
| $\Delta espA-O, P_{pksC-gfp}$          | DNA was extracted from <i>B. subtilis</i> $\Delta espA-O$ (lab stock), and transferred into <i>B. subtilis</i> $P_{pksC-gfp}$ as described in materials and methods. Cm <sup>r</sup> , Sp <sup>r</sup> , Lnc <sup>r</sup> , Ery <sup>r</sup> | This study |

Cm<sup>r</sup> – chloramphenicol resistance, Kan<sup>r</sup> – kanamycin resistance, Sp<sup>r</sup> – spectinomycin resistance, Lnc<sup>r</sup> – lincomycin resistance, Ery<sup>r</sup> – erythromycin resistance

## References

- 1 Branda, S.S. *et al.* (2001) Fruiting body formation by *Bacillus subtilis*. *Proc. Natl. Acad. Sci. U. S. A.* 98, 11621–6
- 2 Rosenberg, G. *et al.* (2016) Not so simple, not so subtle: the interspecies competition between *Bacillus simplex* and *Bacillus subtilis* and its impact on the evolution of biofilms. *npj Biofilms Microbiomes* 2, 15027
- 3 Ogran, A. *et al.* (2019) The plant host induces antibiotic production to select the most-beneficial colonizers. *Appl. Environ. Microbiol.* 85,
- 4 Maan, H. *et al.* (2021) Resolving the conflict between antibiotic production and rapid growth by recognition of peptidoglycan of susceptible competitors. *bioRxiv* DOI: 10.1101/2021.02.07.430110
